# Supplementary material for: LIMK2-NKX3.1 Engagement Promotes Castration-Resistant Prostate Cancer
Source: MDPI journal article supplement (doi:10.3390/cancers13102324), 2021-05-12

(1D)

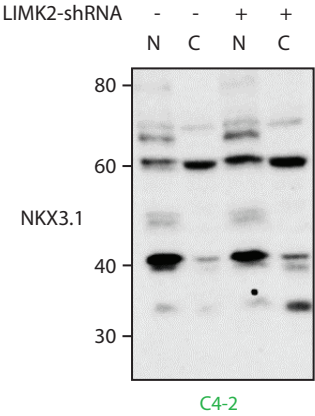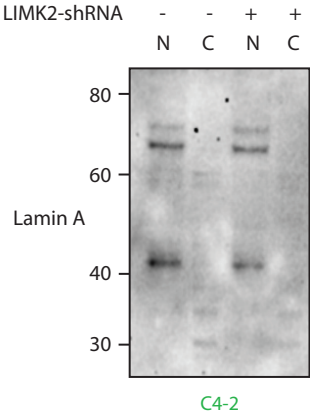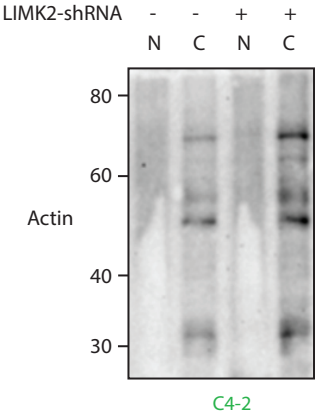

(1G)

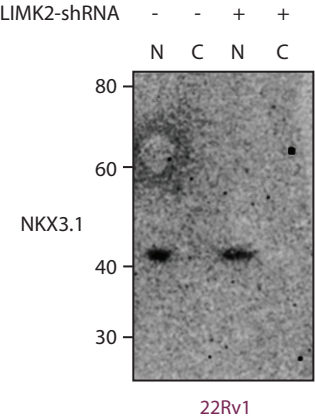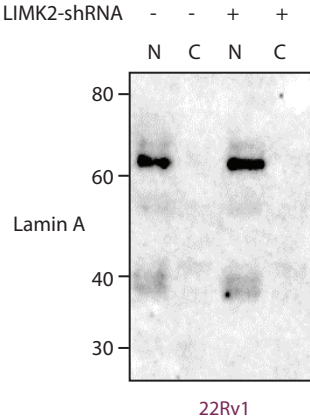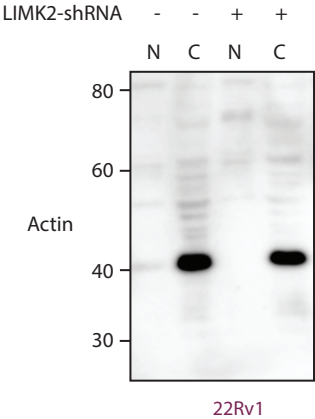

(1N)

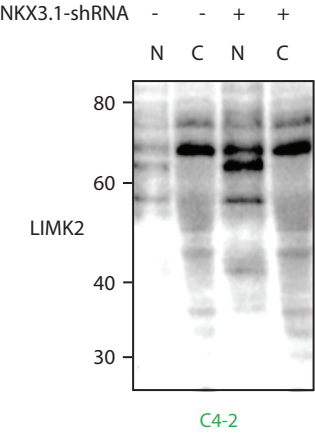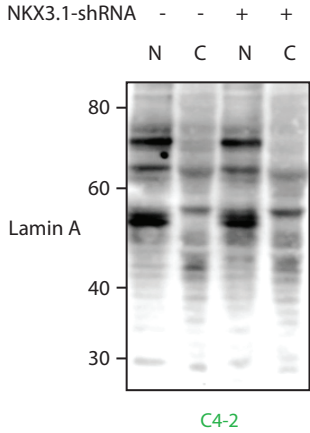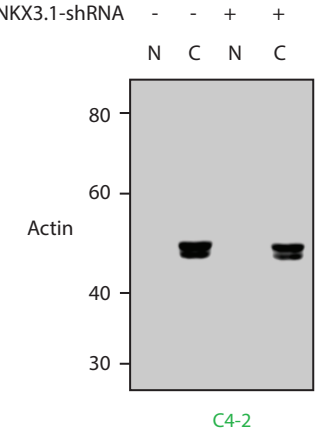

(1Q)

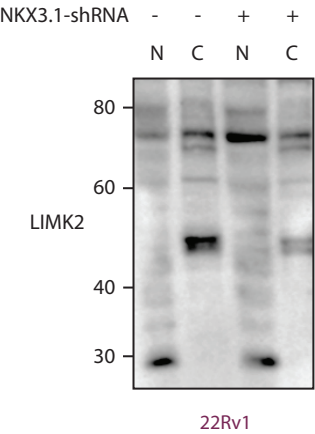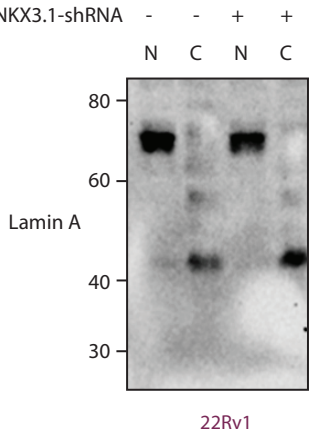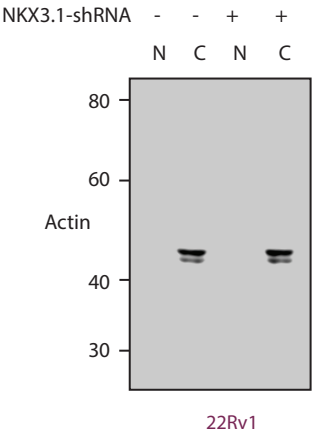

(2A)

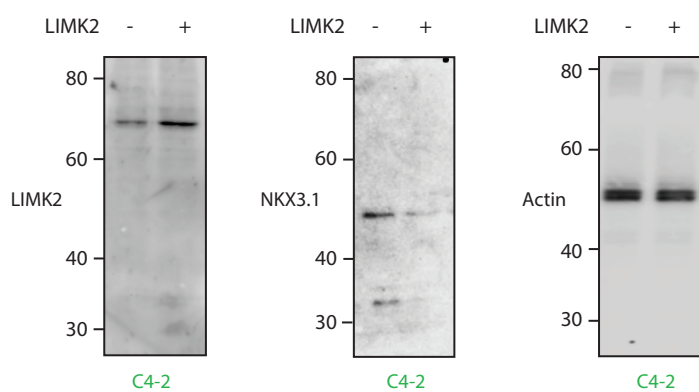

(2C)

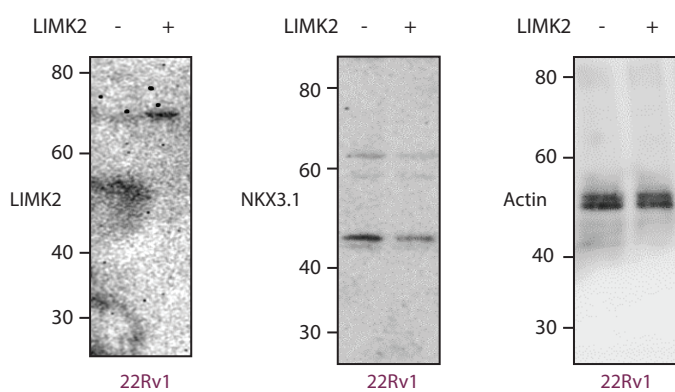

(2E)

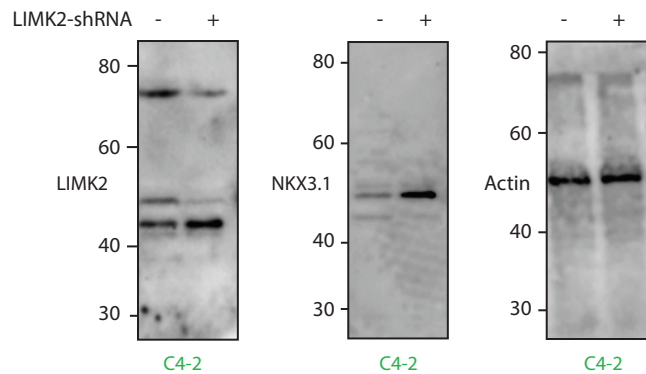

(2G)

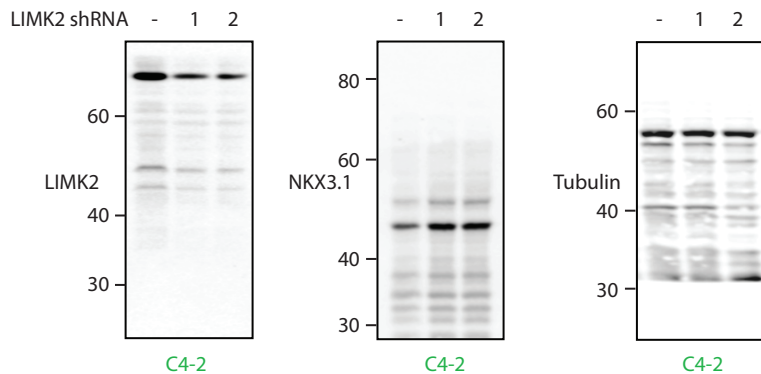

(2H)

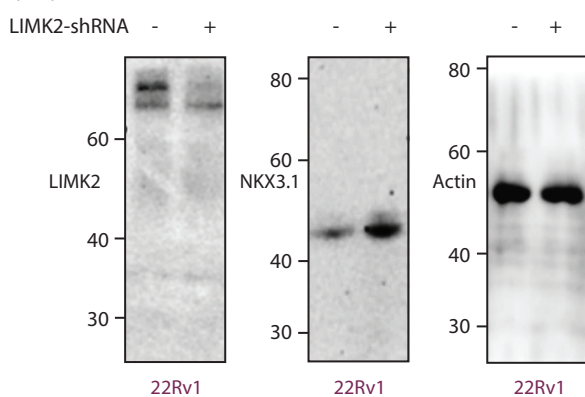

(2J)

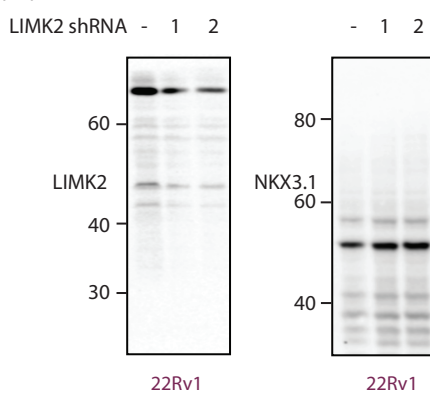

(20)

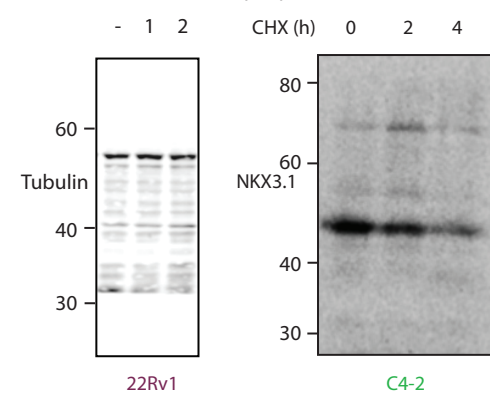

CHX (h)

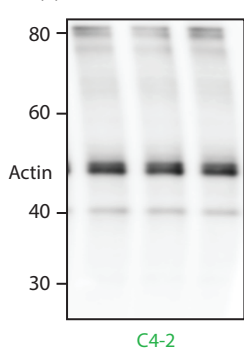

CHX (h)

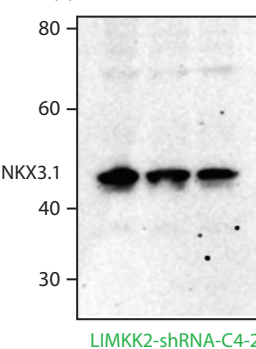

CHX (h)

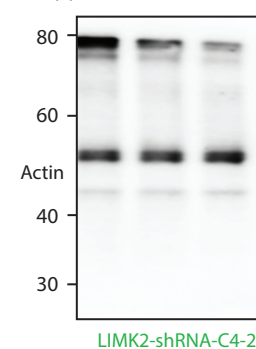

(2Q)

CHX (h)

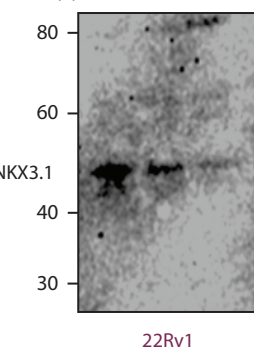

CHX (h)

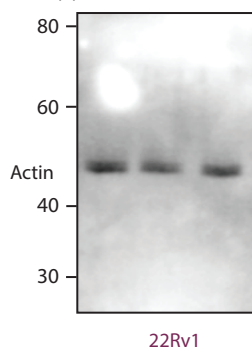

C4-2

LIMKK2-shRNA-C4-2

LIMK2-shRNA-C4-2

22Rv1

22Rv1

CHX (h)

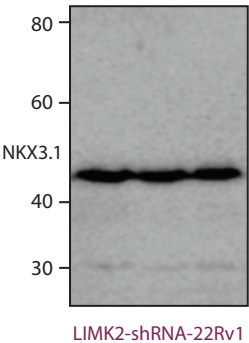

CHX (h)

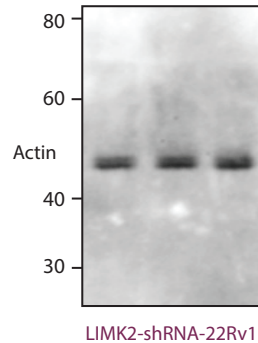

(2S)

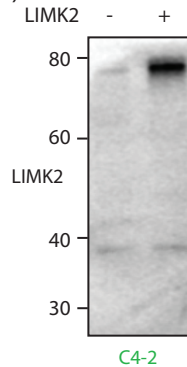

LIMK2

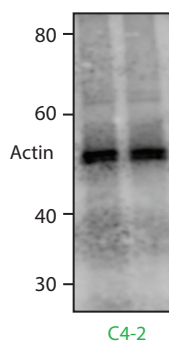

(2T)

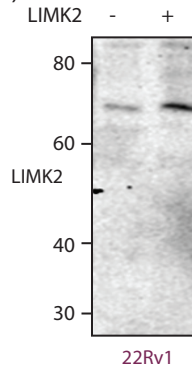

LIMK2

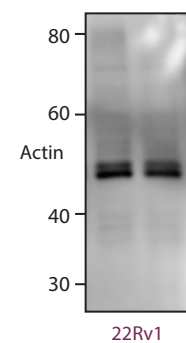

LIMK2-shRNA-22Rv1

LIMK2-shRNA-22Rv1

C4-2

C4-2

22Rv1

22Rv1

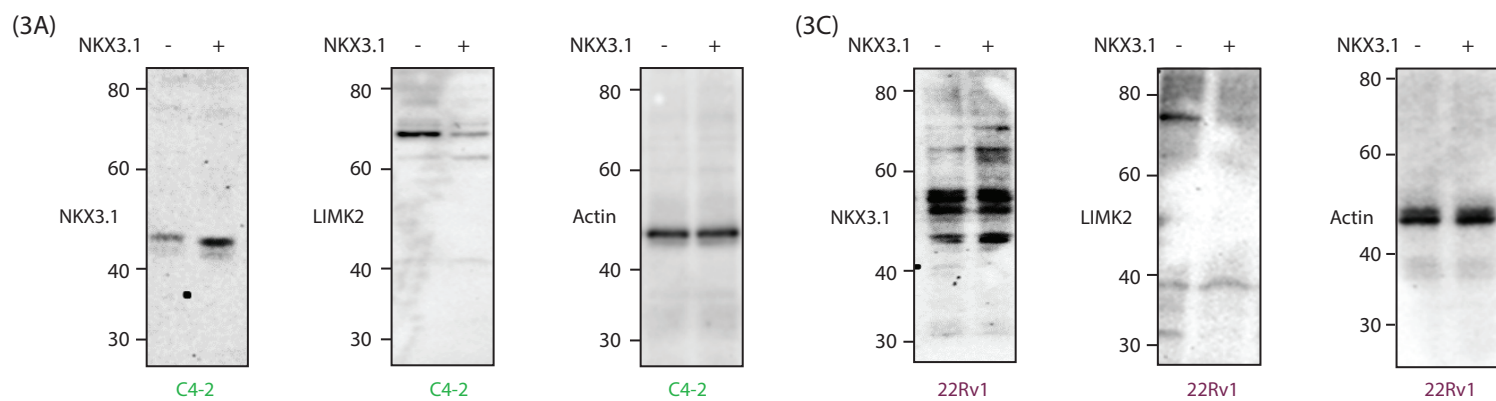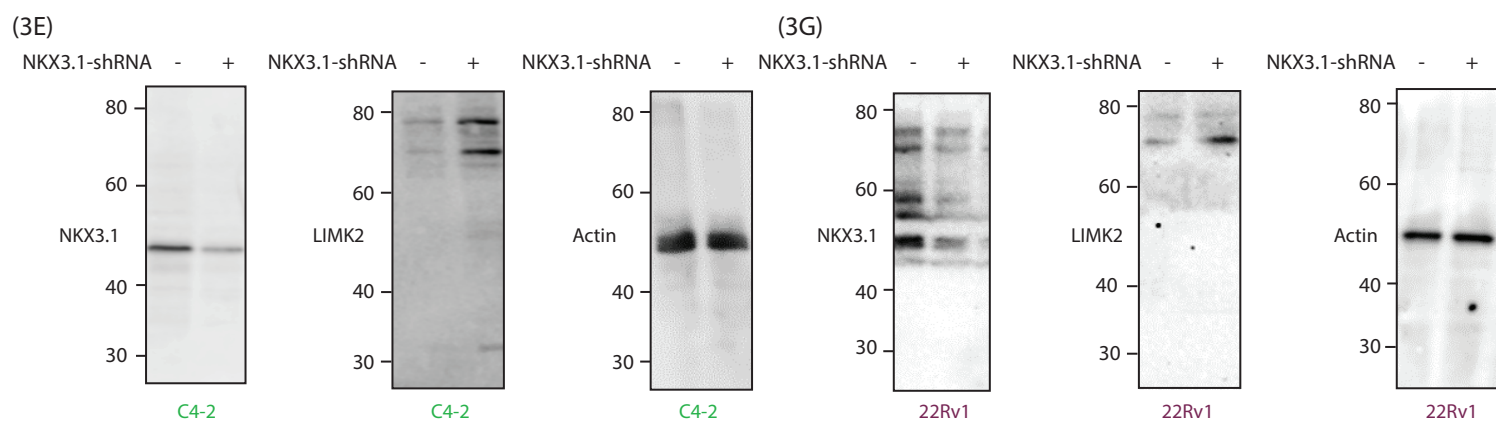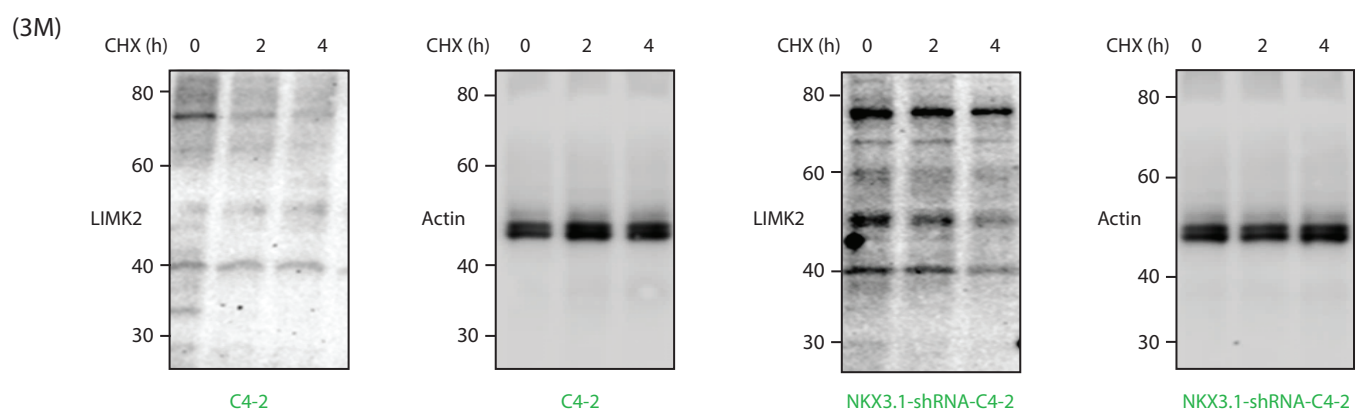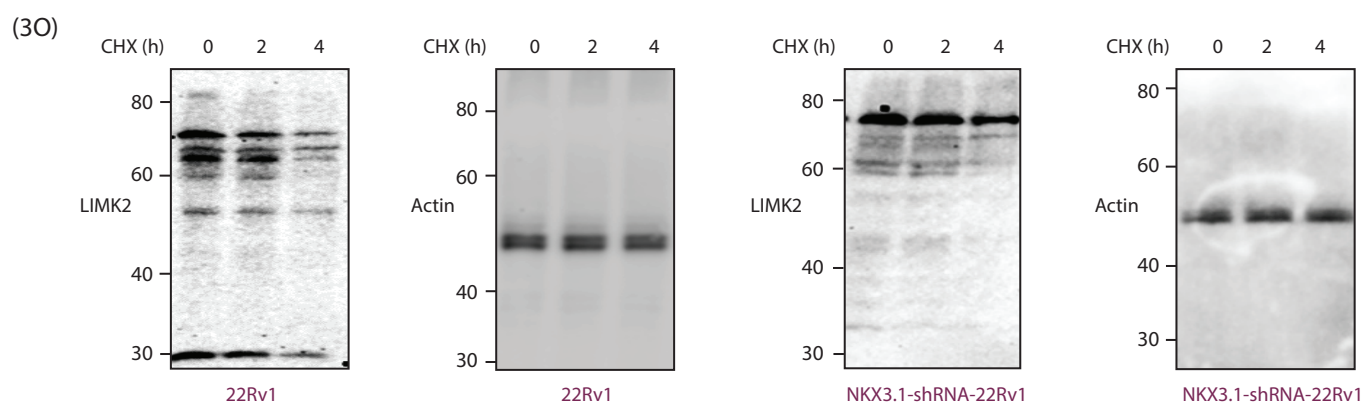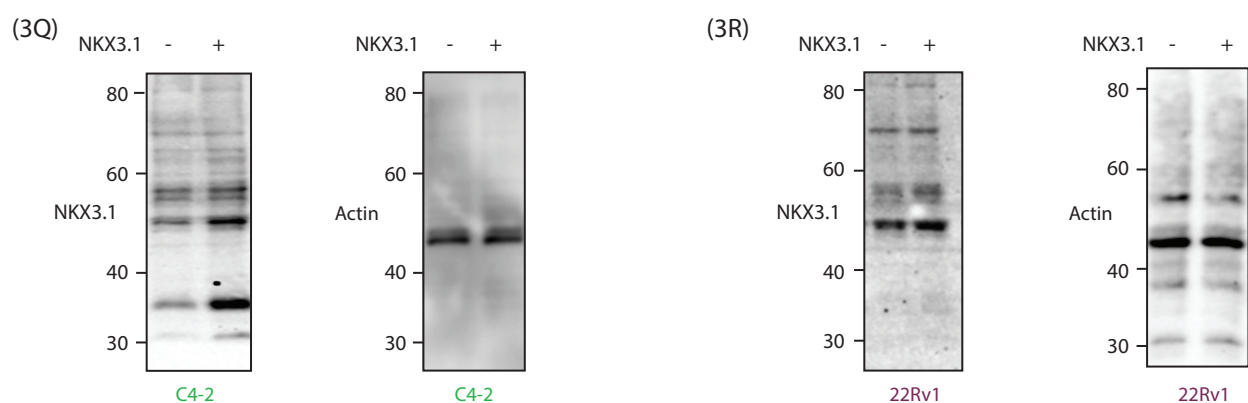



(4B)

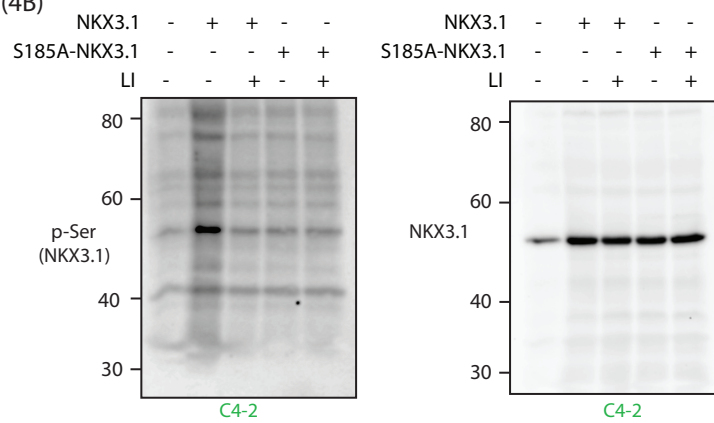

(4D)

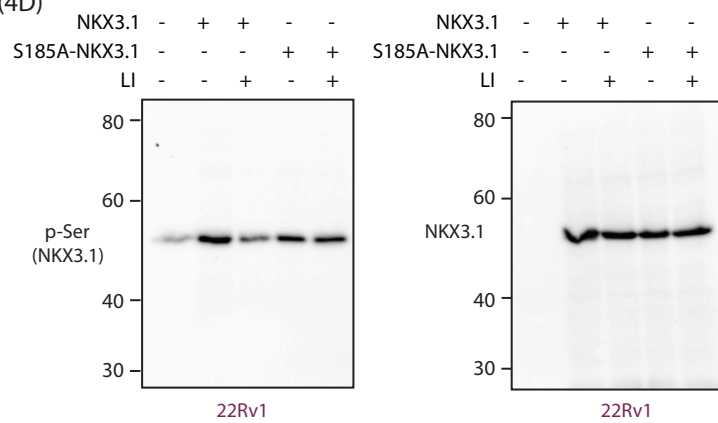

(4F)

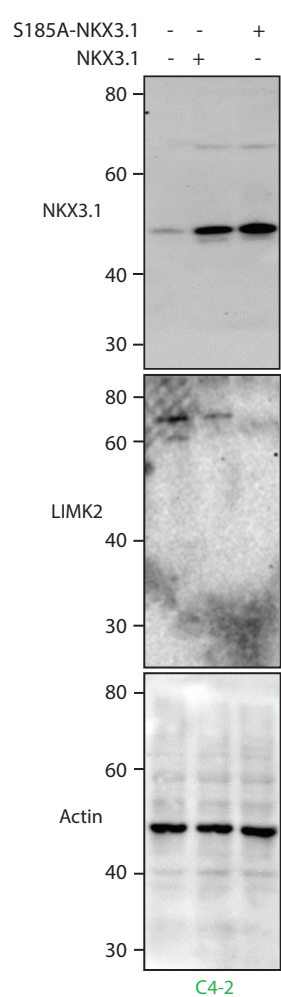

(4H)

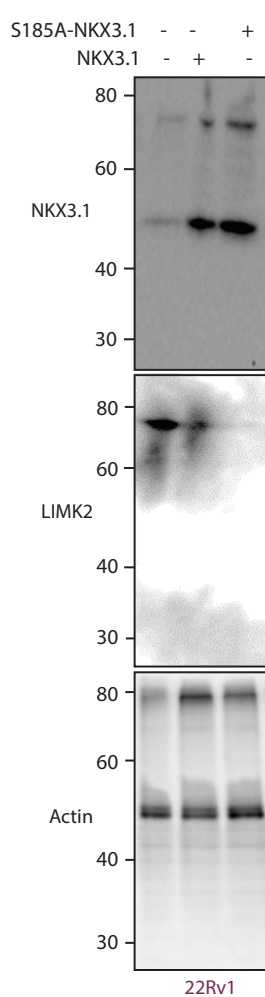

(4N)

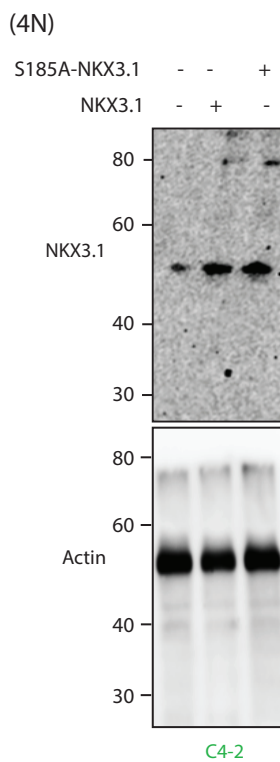

(4O)

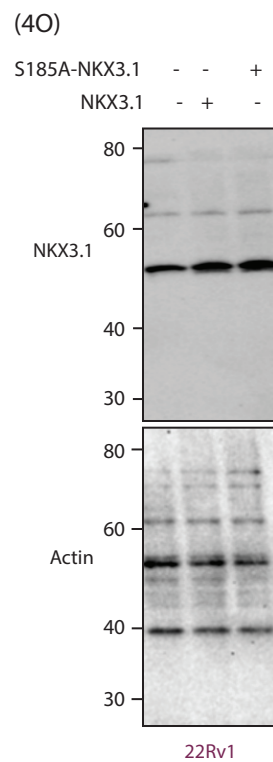

(4J)

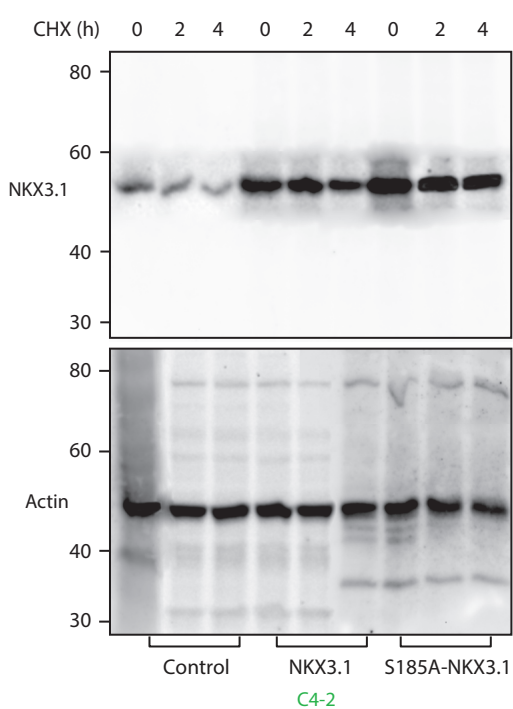

(4L)

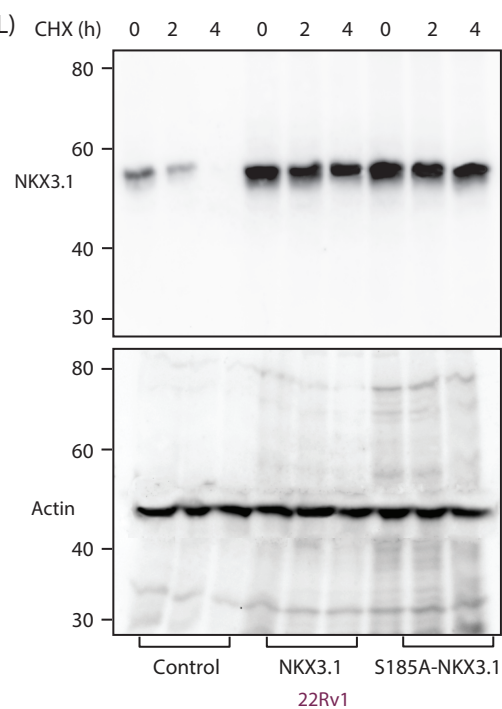



(5A)

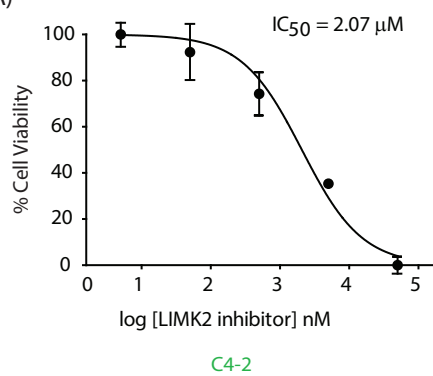

(5B)

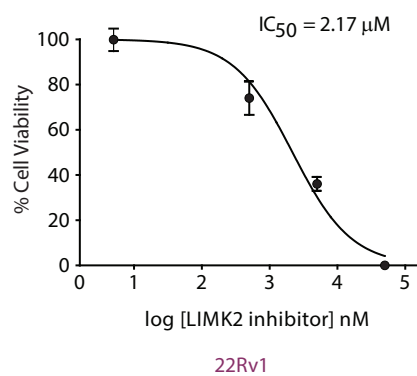

(6A)

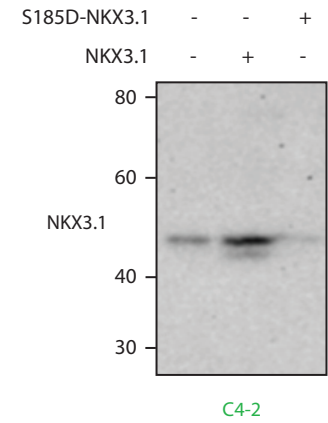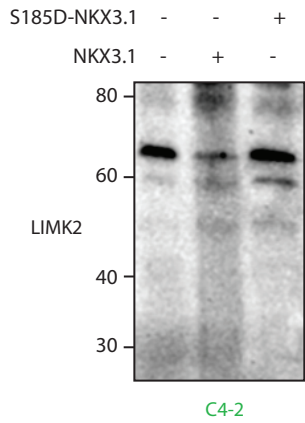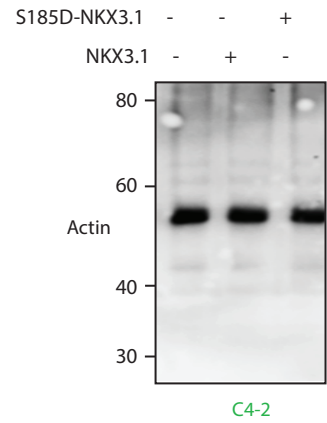

(6C)

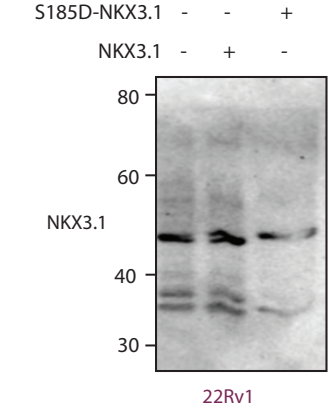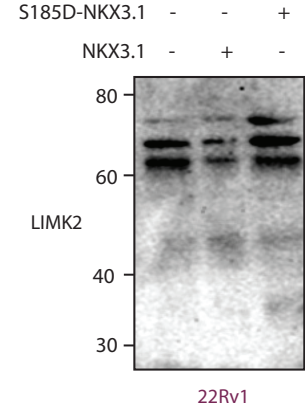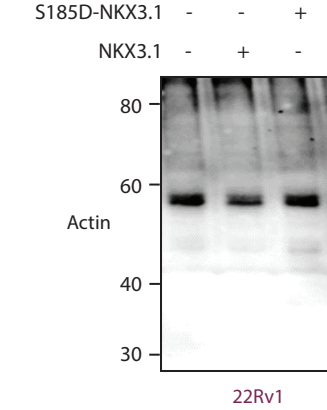

(6E)

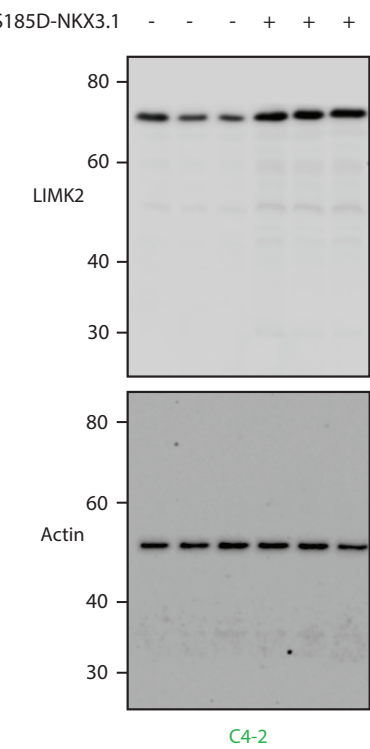

(6G)

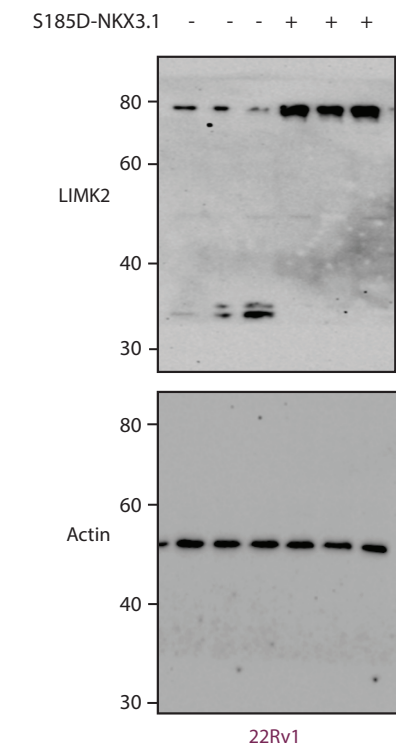

(6I)

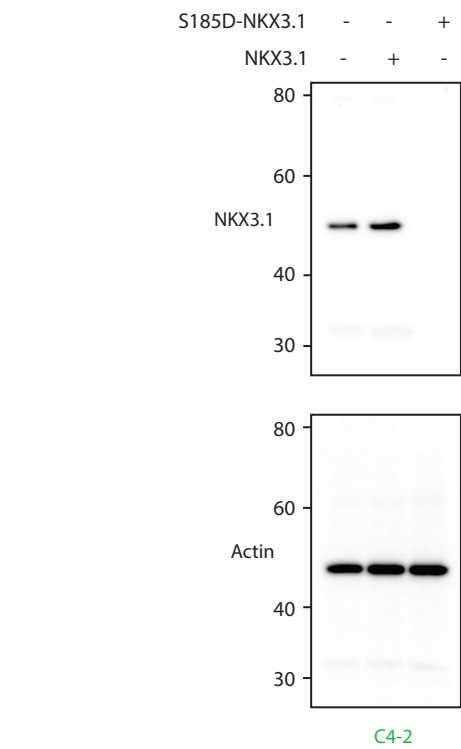

(7A)

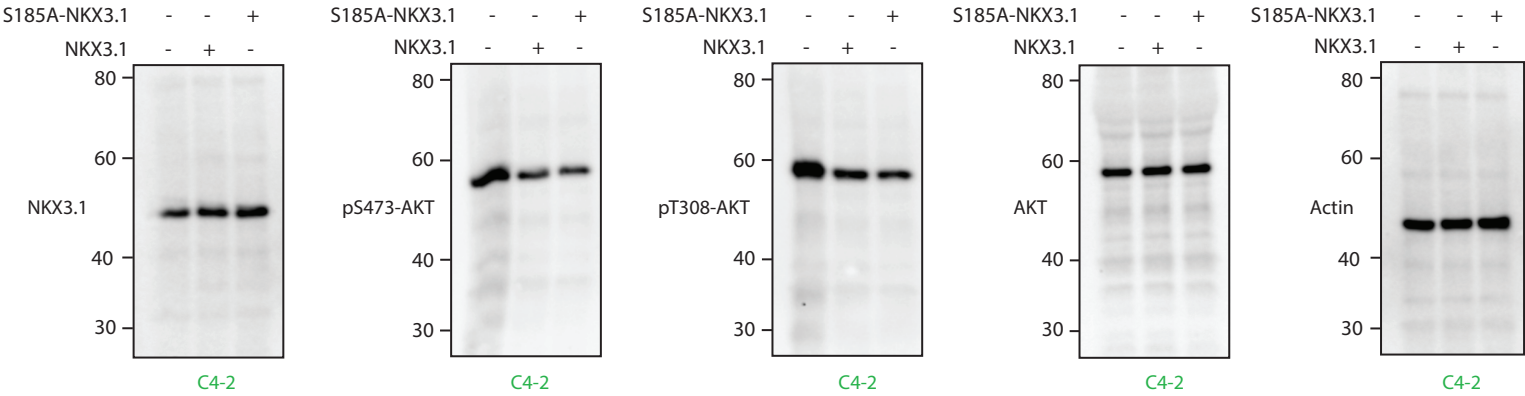

(7C)

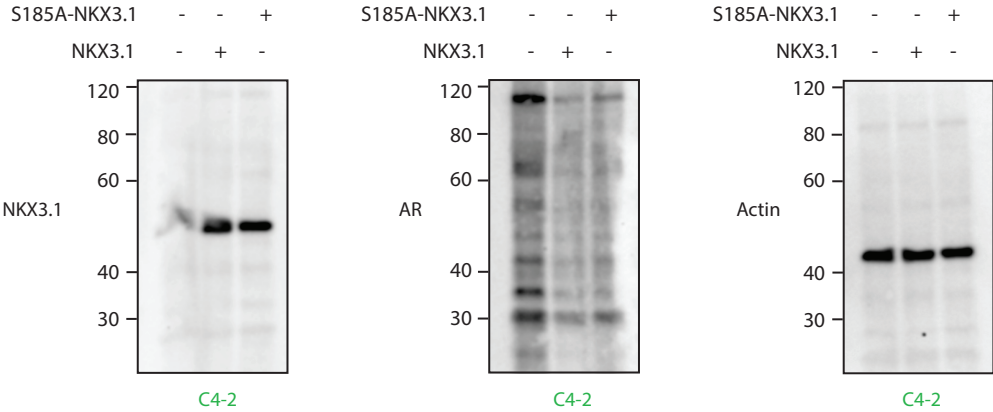

(7E)

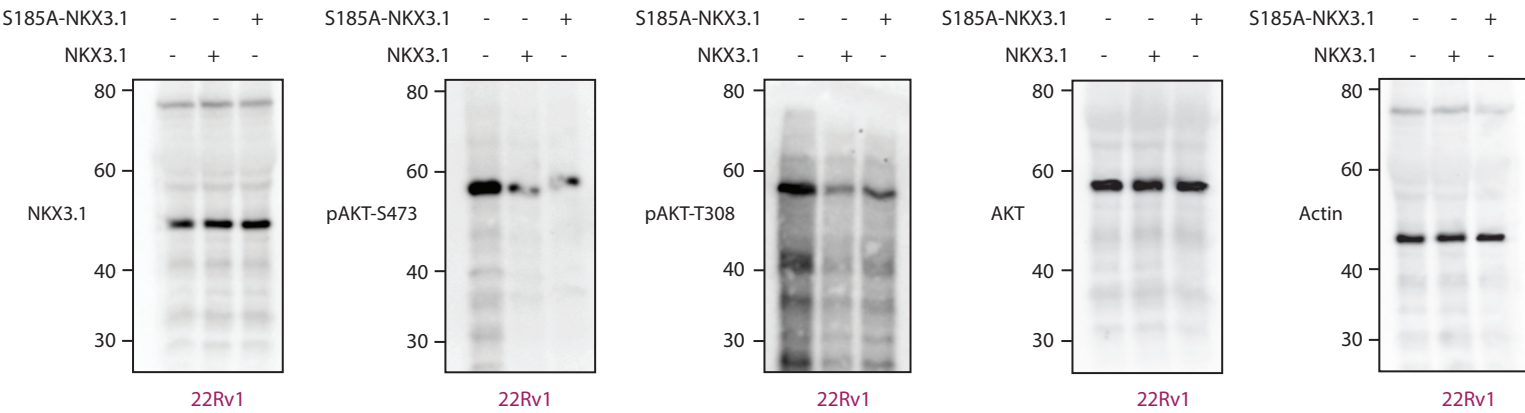

(7G)

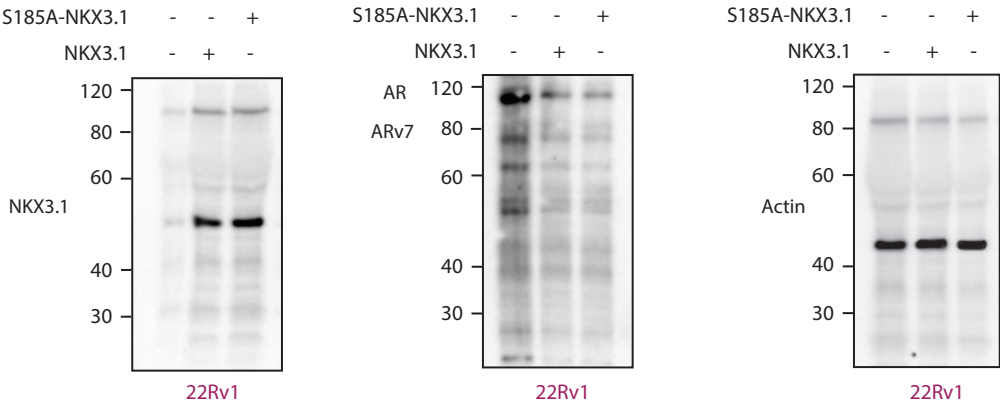



(8A)

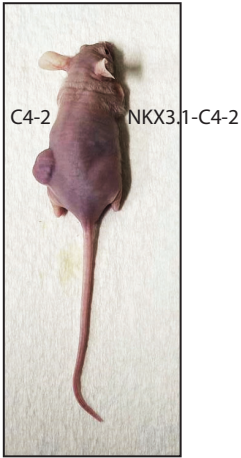

(8B)

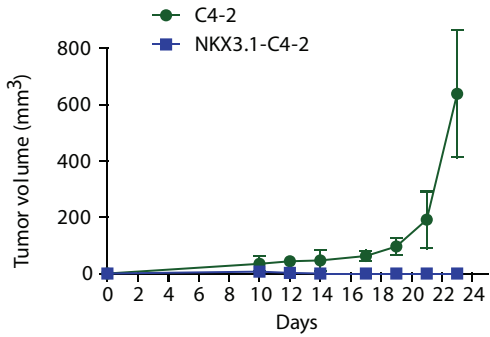

Supplement: s1 [file s1]
